# Supplementary material for: Insulin Resistance, Ceramide Accumulation, and Endoplasmic Reticulum Stress in Human Chronic Alcohol-Related Liver Disease
Source: Hindawi journal article supplement (doi:10.1155/2012/479348), 2012-01-01
Supplement: f1 [file 479348.f1.pdf]

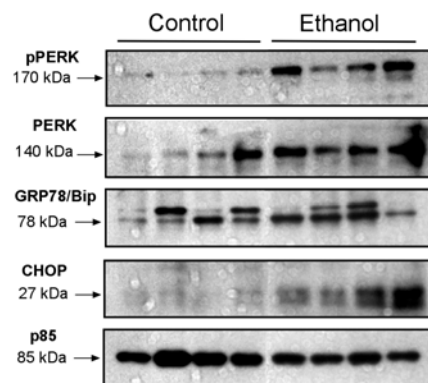

#### Supplementary figure legend .

*Supplementary Figure 1: Effects of chronic ALD on hepatic ER stress protein markers.* ER stress protein expression and phosphorylation were measured in livers of human control and chronic alcoholics by Western Blot analysis. Representative results corresponding to immunoreactivity to phospho-PERK (Thr980), PERK, Bip/GRP78, and CHOP are shown in the autoradiographs. The p85 subunit of PI3K was used as loading control. The generally higher levels of PERK, Bip/GRP78, and CHOP in the ethanol group correspond with results obtained by ELISA (see Figure 5).

Supplementary Figure 1
